# Supplementary material for: Targeting PSAT1 to mitigate metastasis in tumors with p53-72Pro variant
Source: PubMed Central journal article supplement (PMC9929071; doi:10.1038/s41392-022-01266-7), 2023-02-15

Supplementary Fig. S3 Loss of PSAT1 impedes mitochondria-related metabolic pathways in HCC cells.

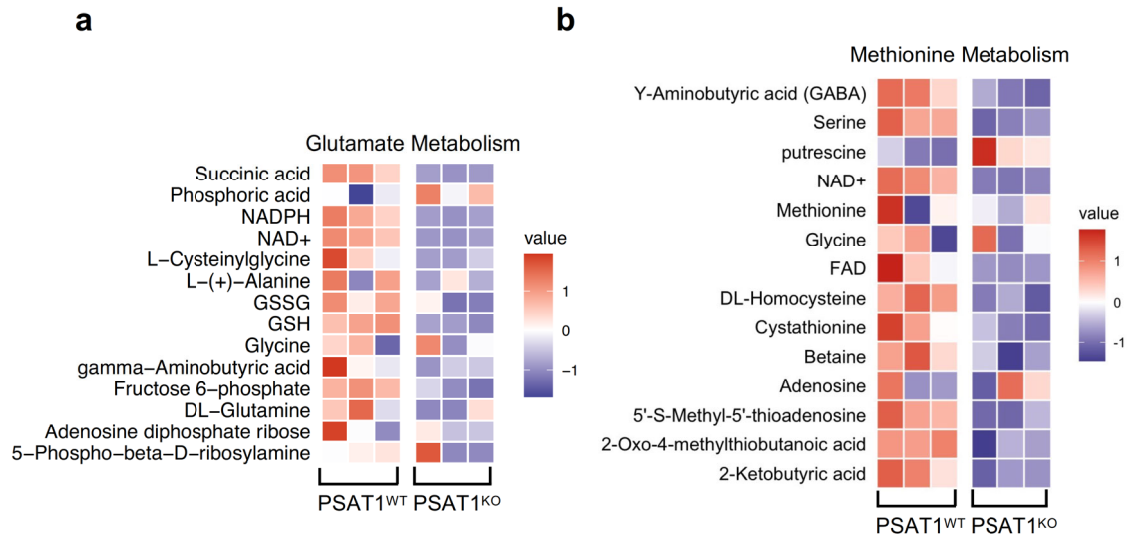

Supplement: 41392_2022_1266_MOESM4_ESM.pdf [file 41392_2022_1266_MOESM4_ESM.pdf]
