# Supplementary material for: Targeting PSAT1 to mitigate metastasis in tumors with p53-72Pro variant
Source: PubMed Central journal article supplement (PMC9929071; doi:10.1038/s41392-022-01266-7), 2023-02-15

Supplementary Fig. S4 PSAT1 deletion retards PGC-1 $\alpha$  nuclear translocation in cells expressing p53<sup>72P</sup>.

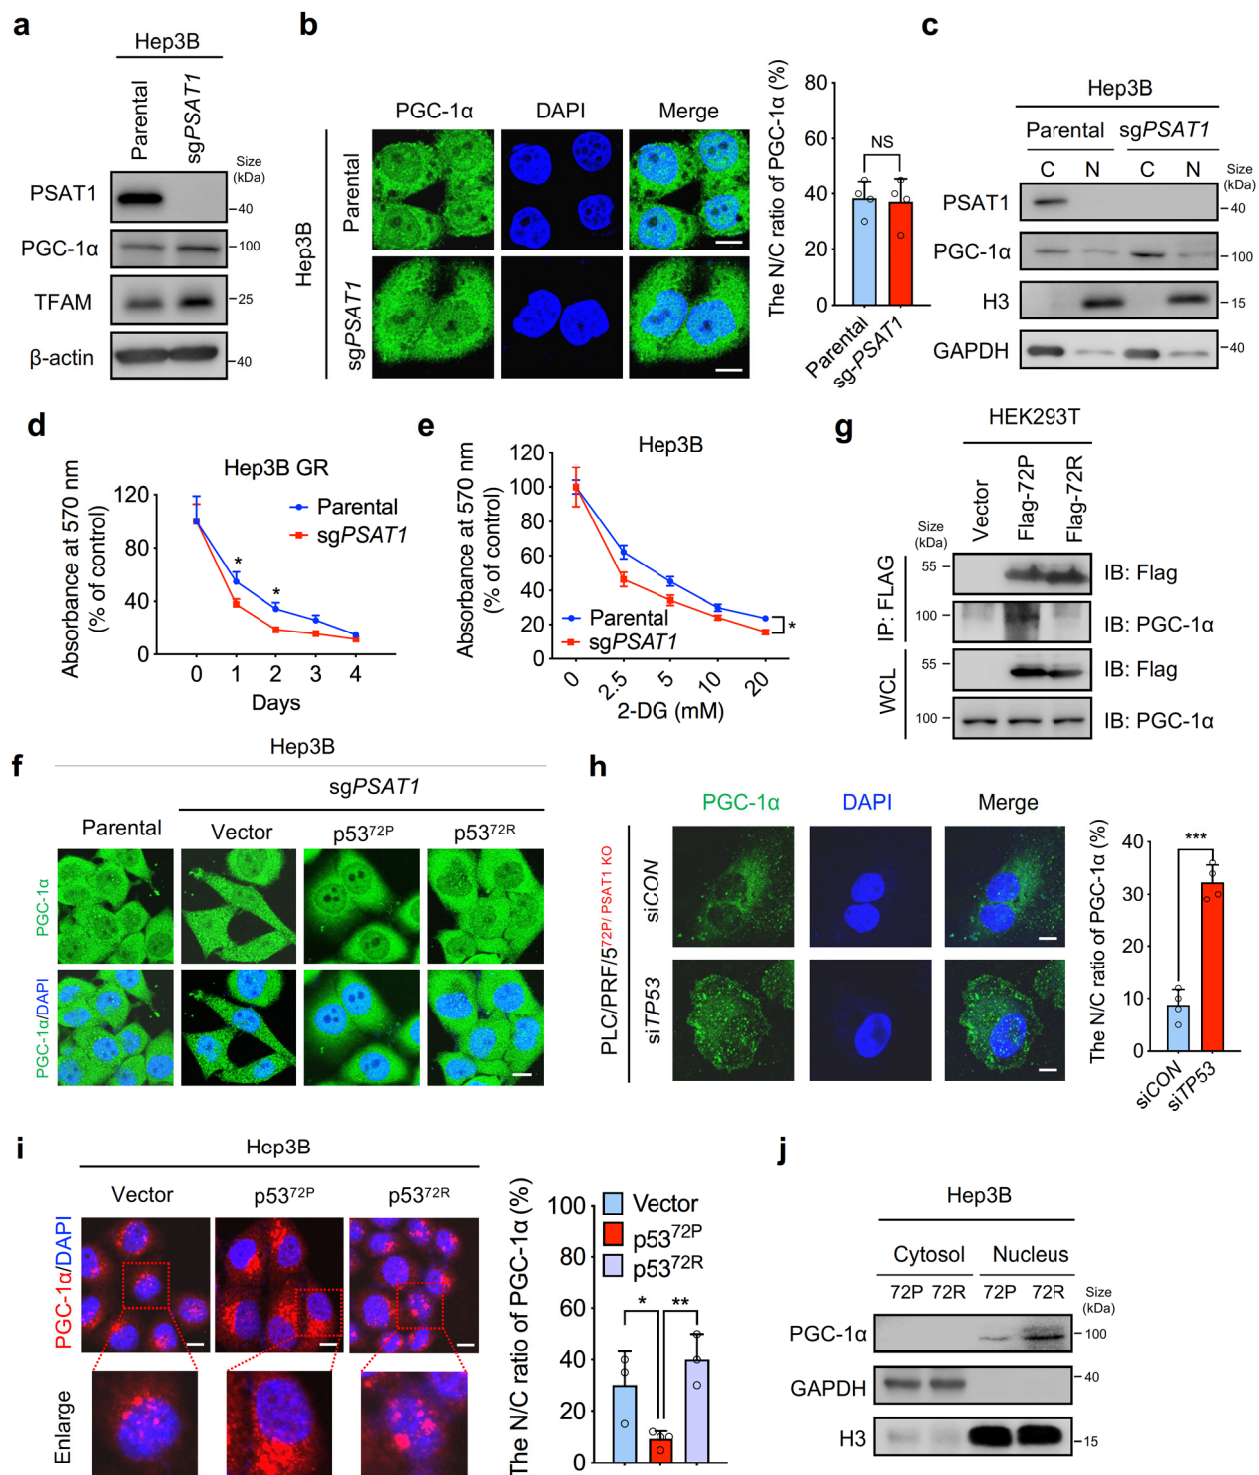

Supplement: 41392_2022_1266_MOESM5_ESM.pdf [file 41392_2022_1266_MOESM5_ESM.pdf]
