# Supplementary material for: Targeting PSAT1 to mitigate metastasis in tumors with p53-72Pro variant
Source: PubMed Central journal article supplement (PMC9929071; doi:10.1038/s41392-022-01266-7), 2023-02-15
Supplement: 41392_2022_1266_MOESM7_ESM.pdf [file 41392_2022_1266_MOESM7_ESM.pdf]

Supplementary Table S1. Clinicopathologic characteristics of liver cancer patients, related to Fig. 2.

| <u>Characteristic</u>    | <u>Cohort (n)</u> |
|--------------------------|-------------------|
| Patients                 | 72                |
| Age,yr (median,range)    | 52 (18-76)        |
| Gender                   |                   |
| Male                     | 57 (79.2%)        |
| Female                   | 15 (20.8%)        |
| Classification           |                   |
| Hepatocellular carcinoma | 65 (90.3%)        |
| Cholangiocarcinoma       | 7 (9.7%)          |
| Grades                   |                   |
| I                        | 4 (5.5%)          |
| I-II                     | 3 (4.2%)          |
| II                       | 30 (41.7%)        |
| II-III                   | 8 (11.1%)         |
| III                      | 27 (37.5%)        |
